# Supplementary material for: Prenatal yoga for stress reduction: results from the FELICITy-2 quasi-randomized controlled trial
Source: Research Square preprint supplement (doi:10.21203/rs.3.rs-7366549/v1), 2025-12-08
Supplement: Supplementary file 1 [file 3b927bb5ccb1507a7ea7d793.pdf]

Code: \_\_\_\_\_

Allgemeiner Fragebogen bei Studieneinschluss (von Probandin auszufüllen)

Datum: .....//.....//.....

Nachname, Vorname: .....

Geburtsdatum:.....

Geburtsland:.....

Geburtsland der Eltern: Mutter:.....Vater:.....

Adresse:.....

Telefonnummer (Mobil u/o Festnetz):.....

Email:.....

Beziehungsstatus (Single/Partnerschaft/verlobt/verheiratet): .....

Voraussichtlich alleinerziehend: ☐ JA ☐ NEIN

Beruf:.....

Aktueller Arbeitsstatus (Beschäftigungsverbot/arbeitend):.....

Nachname des Kindes (wenn bereits entschieden): .....

Letzte Periode: .....//.....//.....

Entbindungstermin:.....//.....//.....

Schwangerschaftswoche (z.B. 15 + 3):.....

Aktuelles Alter:.....

Größe (cm):.....

Aktuelles Gewicht (kg):.....

Gewicht vor der Schwangerschaft (kg):.....

Bisher wie viele Schwangerschaften insgesamt:.....

Bisher wie viele Kinder:.....

Medikamente/Vitamine (z.B. Femibion): .....

Code: \_\_\_\_\_

**Bitte kreuzen Sie das Zutreffendsten an (je eine Antwort):**

Rauchen während der Schwangerschaft: ☐ JA ☐ NEIN

Zigaretten/Tag: .....

Regelmäßiger Alkoholkonsum in der Schwangerschaft: ☐ JA ☐ NEIN

Drogen während der Schwangerschaft: ☐ JA ☐ NEIN

Künstliche Befruchtung (IVF/ICSI): ☐ JA ☐ NEIN

Geplante Schwangerschaft: ☐ JA ☐ NEIN

Sportliche Aktivität **vor** Schwangerschaft: ☐ JA ☐ NEIN

Wenn ja, welche Sportart üben Sie aus? .....

Wenn ja, wie häufig machen Sie Sport (in min/Woche)? .....

Sportliche Aktivität **in** Schwangerschaft (aktuell): ☐ JA ☐ NEIN

Wenn ja, welche Sportart üben Sie aus? .....

Wenn ja, wie häufig machen Sie Sport (in min/Woche)? .....

Yoga-Praktizieren **vor** Teilnahme an der Studie: ☐ JA ☐ NEIN

Wenn ja, seit wann? .....

Wenn ja, wie häufig (in min/Woche)? .....

Höchster Abschluss:

☐ Hauptschule

☐ Realschule

☐ Abitur

☐ Hochschule/Universität

Monatliches Einkommen/Haushalt (Netto):

☐ < 1000€

☐ 1000-2500€

☐ 2500-5000€

☐ 5000-10000

☐ >10000 €

Code: \_\_\_\_\_

Klinische Anamnese bei Studieneinschluss (vom Studienbeauftragten auszufüllen)

**Ergebnis des Stresstests** (PSS-10): .....

**Allgemeines zu früheren Schwangerschaften:**

|                                  |  |            |  |
|----------------------------------|--|------------|--|
| Plazentalösung                   |  | Frühgeburt |  |
| SIH/Präeklampsie/Eklampsie/HELLP |  | IUGR/SGA   |  |
| Perinatale Mortalität            |  |            |  |

.....

.....

.....

**Aktuelle Schwangerschaft:**

|                             |  |                       |   |
|-----------------------------|--|-----------------------|---|
| Gestationsdiabetes          |  | Arterielle Hypertonie |   |
| Autoimmune Erkrankung       |  | Thrombophilie         |   |
| Schätzwicht <10. Perzentile |  | RR                    | / |

.....

.....

.....

Code: \_\_\_\_\_

|                                                  |
|--------------------------------------------------|
| Follow-Up Fragebogen (von Probandin auszufüllen) |
|--------------------------------------------------|

Datum: .....//.....//.....

Nachname, Vorname: .....

Geburtsdatum: .....

Schwangerschaftswoche (z.B. 15 + 3): .....

Aktuelles Gewicht (in kg): .....

Arbeitsstatus (Beschäftigungsverbot/arbeitend).....

Beziehungsstatus (Single/Partnerschaft/verlobt/verheiratet): .....

Voraussichtlich alleinerziehend: ☐ JA ☐ NEIN

Sportliche Aktivität **in** Schwangerschaft (aktuell): ☐ JA ☐ NEIN

Wenn ja, welche Sportart üben Sie aus? .....

Wenn ja, wie häufig machen Sie Sport (in min/Woche)? .....

Yoga-Praktizieren **während** Teilnahme an Studie: ☐ JA ☐ NEIN

Wenn ja, im Yogakurs der Studie? ☐ JA ☐ NEIN

Wenn ja, (evtl. zusätzlich) privat organisiert? ☐ JA ☐ NEIN

Wenn ja, wie häufig (in min/Woche)? .....

Voraussichtlicher Entbindungsort? .....

Code: \_\_\_\_\_

|                                                           |
|-----------------------------------------------------------|
| Perinatales Outcome (vom Studienbeauftragten auszufüllen) |
|-----------------------------------------------------------|

Datum: .....//.....//.....

|                          |  |                               |  |
|--------------------------|--|-------------------------------|--|
| PE/E/HELLP               |  | SIH                           |  |
| Kindsgewicht             |  | Perzentile                    |  |
| Länge                    |  | Kopfumfang                    |  |
| Geschlecht               |  | Gestationsalter bei<br>Geburt |  |
| Geburtsdatum             |  | Geburtsmodus                  |  |
| Ind. zur EL              |  | Ind. zur Sectio               |  |
| Lungenreife              |  | APGAR 1/5/10 min              |  |
| Nabelschnur-pH (art)     |  | BE                            |  |
| pO <sub>2</sub>          |  | pCO <sub>2</sub>              |  |
| Laktat                   |  | Glucose                       |  |
| Postpartale Aufnahme Neo |  | Grund                         |  |

.....

.....

.....
