# Supplementary material for: Prenatal yoga for stress reduction: results from the FELICITy-2 quasi-randomized controlled trial
Source: Research Square preprint supplement (doi:10.21203/rs.3.rs-7366549/v1), 2025-12-08
Supplement: Supplementary file 2 [file c29df8919878960b149ec948.pdf]

Nachname, Vorname: \_\_\_\_\_ Datum: \_\_\_\_\_ Schwangerschaftswoche (z.B. 15+3): \_\_\_\_\_ Code: \_\_\_\_\_

### Fragebogen 1 zur Stresserfassung

| Die folgenden Fragen beschäftigen sich damit, wie häufig Sie sich während des letzten Monats durch Stress belastet fühlen. (Bitte <b>pro</b> Aussage <b>eine</b> Antwort ankreuzen) | Nie | Selten | Manchmal | Häufig | Sehr oft |
|-------------------------------------------------------------------------------------------------------------------------------------------------------------------------------------|-----|--------|----------|--------|----------|
| 1. Wie oft hatten Sie sich im letzten Monat darüber aufgeregt, dass etwas völlig Unerwartetes eingetreten ist?                                                                      |     |        |          |        |          |
| 2. Wie oft hatten Sie im letzten Monat das Gefühl, wichtige Dinge in Ihrem Leben nicht beeinflussen zu können?                                                                      |     |        |          |        |          |
| 3. Wie oft hatten Sie sich im letzten Monat nervös und „gestresst“ gefühlt?                                                                                                         |     |        |          |        |          |
| 4. Wie oft hatten Sie sich im letzten Monat sicher im Umgang mit persönlichen Aufgaben und Problemen gefühlt?                                                                       |     |        |          |        |          |
| 5. Wie oft hatten Sie im letzten Monat das Gefühl, dass sich die Dinge nach Ihren Vorstellungen entwickeln?                                                                         |     |        |          |        |          |
| 6. Wie oft hatten Sie im letzten Monat das Gefühl, mit all den anstehenden Aufgaben und Problemen nicht richtig umgehen zu können?                                                  |     |        |          |        |          |
| 7. Wie oft hatten Sie im letzten Monat das Gefühl, mit Ärger in Ihrem Leben klar zu kommen ?                                                                                        |     |        |          |        |          |
| 8. Wie oft hatten Sie im letzten Monat das Gefühl, alles im Griff zu haben?                                                                                                         |     |        |          |        |          |
| 9. Wie oft hatten Sie sich im letzten Monat darüber geärgert, wichtige Dinge nicht beeinflussen zu können?                                                                          |     |        |          |        |          |
| 10. Wie oft hatten Sie im letzten Monat das Gefühl, dass sich die Probleme so aufgestaut haben, dass Sie diese nicht mehr bewältigen können?                                        |     |        |          |        |          |

### Referenzen:

1. Cohen S, Kamarck T, Mermelstein R. A global measure of perceived stress. J Health Soc Behav. 1983;24(4):385–96.
2. Klein EM, Brähler E, Dreier M, Reinecke L, Müller KW, Schmutzer G, et al. The German version of the Perceived Stress Scale—psychometric characteristics in a representative German community sample. BMC psychiatry. 2016;16:1–10.

Nachname, Vorname: \_\_\_\_\_ Datum: \_\_\_\_\_ Schwangerschaftswoche (z.B. 15+3): \_\_\_\_\_ Code: \_\_\_\_\_

## Fragebogen 2 zur Stresserfassung

| Kreuzen Sie jeweils <b>eine</b> Antwortalternative an, die Ihnen als beste Schätzung am Zutreffendsten erscheint.                                              | Trifft gar nicht zu | Trifft ein wenig zu | Trifft mäßig stark zu | Trifft stark zu | Trifft sehr stark zu |
|----------------------------------------------------------------------------------------------------------------------------------------------------------------|---------------------|---------------------|-----------------------|-----------------|----------------------|
| 1. Mich stören Gewichtszunahmen während der Schwangerschaft.                                                                                                   |                     |                     |                       |                 |                      |
| 2. Körperliche Symptome wie Übelkeit, Erbrechen, geschwellene Füße oder Rückenschmerzen, die im Zusammenhang mit der Schwangerschaft auftreten, belasten mich. |                     |                     |                       |                 |                      |
| 3. Ich bin besorgt darüber, wie ich mein Baby richtig versorge, wenn ich nach der Krankenhausentlassung wieder nach Hause komme.                               |                     |                     |                       |                 |                      |
| 4. Mich plagen die gefühlsmäßigen Höhen und Tiefen während der Schwangerschaft.                                                                                |                     |                     |                       |                 |                      |
| 5. Ich mache mir Sorgen darüber, dass sich meine Beziehungen zu anderen Menschen, die mir wichtig sind, während meiner Schwangerschaft verändern.              |                     |                     |                       |                 |                      |
| 6. Ich mache mir Sorgen, ob ich mich für mein Baby gesund und ausgewogen genug ernähre.                                                                        |                     |                     |                       |                 |                      |
| 7. Insgesamt belasten mich die Veränderungen meiner Figur und meines Körperumfangs.                                                                            |                     |                     |                       |                 |                      |
| 8. Ich mache mir Sorgen darüber, dass sich durch das Baby die Beziehung zum Vater des Kindes ändern wird.                                                      |                     |                     |                       |                 |                      |
| 9. Ich mache mir Sorgen darüber, ein krankes Baby zur Welt zu bringen.                                                                                         |                     |                     |                       |                 |                      |
| 10. Ich habe Angst vor den Wehen und der Geburt.                                                                                                               |                     |                     |                       |                 |                      |
| 11. Ich habe Angst vor einer möglichen Frühgeburt.                                                                                                             |                     |                     |                       |                 |                      |
| 12. Ich mache mir Sorgen darüber, dass ich keinen emotionalen Bezug zu meinem Baby finde.                                                                      |                     |                     |                       |                 |                      |

### Referenzen:

1. Yali AM, Lobel M. Coping and distress in pregnancy: an investigation of medically high risk women. J Psychosom Obstet Gynaecol. 1999;20(1):39–52; doi: 10.3109/01674829909075575.
2. Pluess M, Bolten M, Pirke K-M, Hellhammer D. Maternal trait anxiety, emotional distress, and salivary cortisol in pregnancy. Biological psychology. 2010;83(3):169–75.
